# Supplementary material for: Delineation of G Protein-Coupled Receptor Kinase Phosphorylation Sites within the D1 Dopamine Receptor and Their Roles in Modulating β-Arrestin Binding and Activation
Source: MDPI journal article supplement (doi:10.3390/ijms24076599), 2023-04-01
Supplement: s1 [file s1]

## SUPPLEMENTARY MATERIALS

**Table S1.** [<sup>3</sup>H] SCH 23390 saturation binding data for selected D1R constructs used in this study

| D1 Receptor              | Bmax mean ± SEM<br>(fmol/mg) <sup>1</sup> | K <sub>d</sub> mean ± SEM<br>(nM) <sup>2</sup> |
|--------------------------|-------------------------------------------|------------------------------------------------|
| WT                       | 1880 ± 650                                | 0.6 ± 0.1                                      |
| T <sub>0</sub>           | 1270 ± 280                                | 0.7 ± 0.2                                      |
| T <sub>1</sub>           | 1240 ± 260                                | 0.6 ± 0.1                                      |
| T <sub>2</sub>           | 3960 ± 910                                | 1.3 ± 0.3                                      |
| T <sub>3</sub>           | 3040 ± 270                                | 1.2 ± 0.2                                      |
| S13-20                   | 2620 ± 320                                | 1.1 ± 0.2                                      |
| Tail Total               | 940 ± 200*                                | 0.6 ± 0.1                                      |
| S234                     | 1900 ± 730                                | 0.5 ± 0.2                                      |
| Rev T5S6                 | 1890 ± 730                                | 1.1 ± 0.3                                      |
| T5V/S6A                  | 2800 ± 730                                | 1.4 ± 0.4                                      |
| T <sub>1</sub> + T5V/S6A | 2000 ± 640                                | 1.0 ± 0.3                                      |
| GRK-null                 | 800 ± 120*                                | 0.6 ± 0.03                                     |
| PKC-null                 | 2050 ± 700                                | 0.8 ± 0.1                                      |
| PKC-null + A259S         | 2100 ± 300                                | 1.1 ± 0.2                                      |

<sup>1</sup> Bmax values are expressed as mean ± SEM of at least three experiments performed in triplicate. Statistical comparisons between WT and mutant parameters were made using a one-way ANOVA with Dunnett's post-hoc comparison. \*p < 0.05 vs. WT.

<sup>2</sup> K<sub>d</sub> values are expressed as mean ± SEM of at least three experiments performed in triplicate. Statistical comparisons between WT and mutant parameters were made using a one-way ANOVA with Dunnett's post-hoc comparison. For all mutants, p > 0.05 vs. WT.

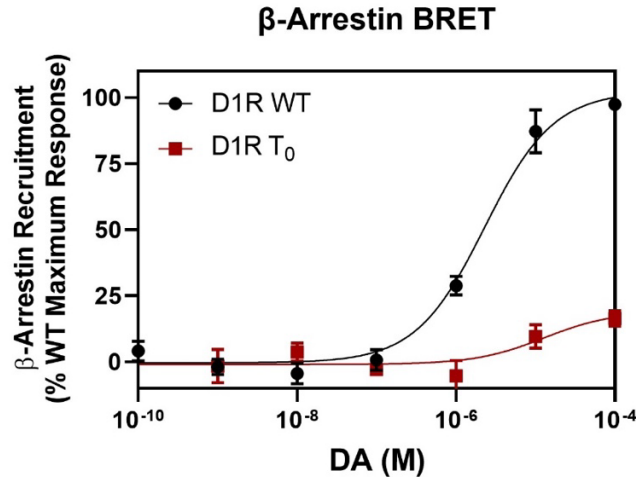

**Figure S1.**  $\beta$ -arrestin recruitment is severely impaired by the D1R T<sub>0</sub> C-terminal truncation in an orthogonal assay of  $\beta$ -arrestin recruitment. Direct D1R- $\beta$ -arrestin recruitment BRET assays were performed as described in *Methods*. D1R WT  $EC_{50} = 2.0 \pm 0.4 \mu M$ ,  $E_{max} = 100\%$ ; D1R T<sub>0</sub>  $EC_{50} =$  undefined,  $E_{max} = 13 \pm 6.5\%^{***}$ . Data are expressed as a percentage of the maximum WT response to DA and are shown as mean  $\pm$  SEM of three experiments each performed in triplicate. Statistical comparisons between WT and mutant parameters were made using a t-test:  $^{***}p < 0.001$ .

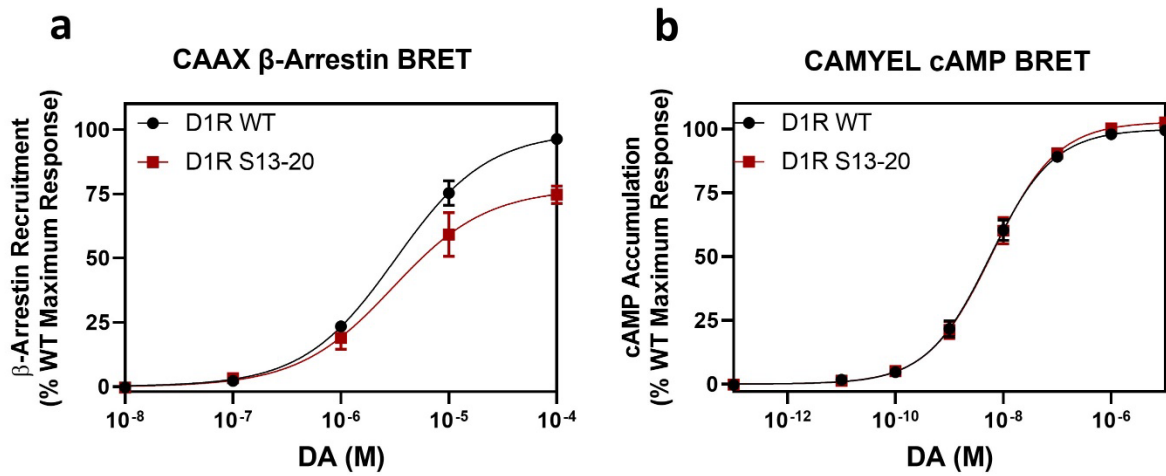

**Figure S2.**  $\beta$ -arrestin recruitment is impaired by simultaneous mutation of the last eight serines and threonines in the distal C-terminus of the receptor (D1R S13-20). CAAX  $\beta$ -arrestin recruitment and CAMYEL cAMP accumulation assays were performed as described in *Methods*. Data are expressed as a percentage of the maximum D1R WT DA response in each experiment and are displayed as mean  $\pm$  SEM of at least three experiments, performed in triplicate. **a)** D1R WT  $EC_{50} = 3.4 \pm 0.4 \mu M$ ,  $E_{max} = 100\%$ ; D1R S13-20  $EC_{50} = 3.7 \pm 1.1 \mu M$ ,  $E_{max} = 78 \pm 1.7\%^{***}$ . **b)** D1R WT  $EC_{50} = 6.1 \pm 1.5 nM$ ,  $E_{max} = 100\%$ ; D1R S13-20  $EC_{50} = 6.8 nM \pm 2.0 nM$ ,  $E_{max} = 103\% \pm$

0.6\*. Statistical comparisons between WT and mutant parameters were made using a t-test: \* $p < 0.05$ , \*\*\* $p < 0.001$ .

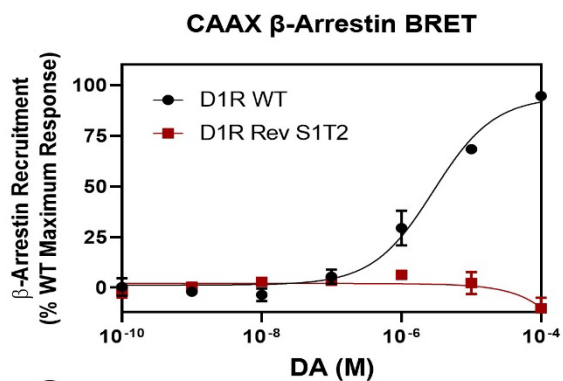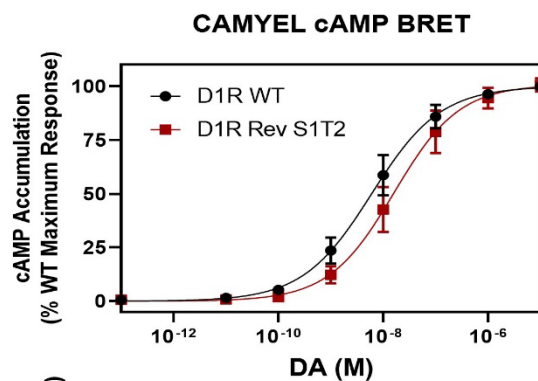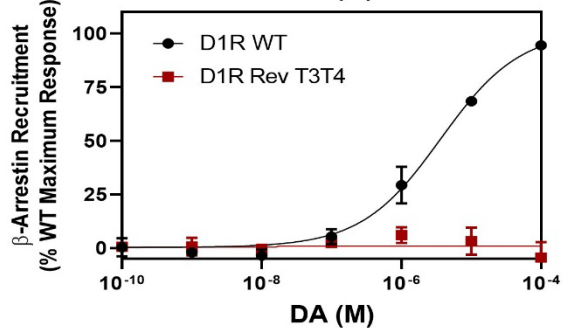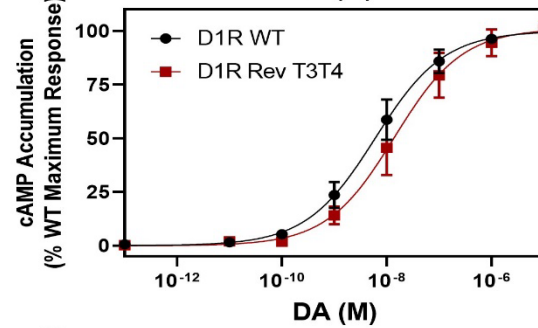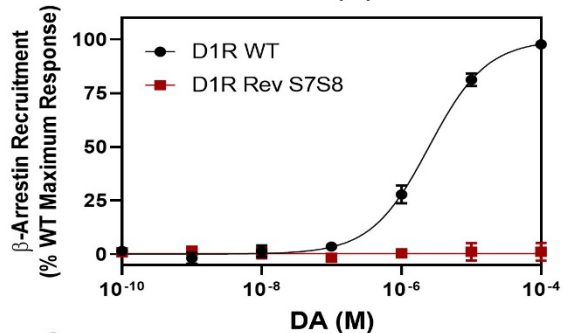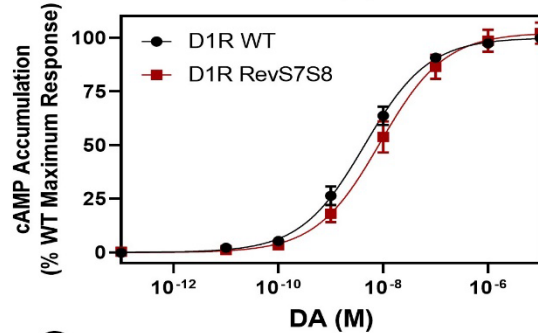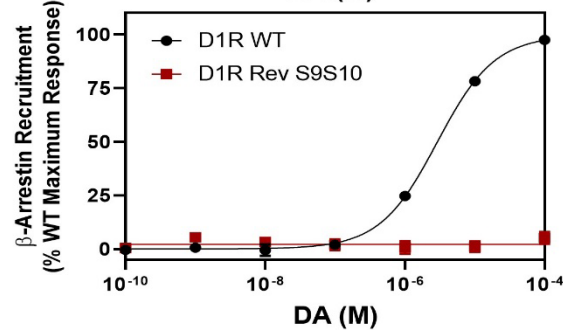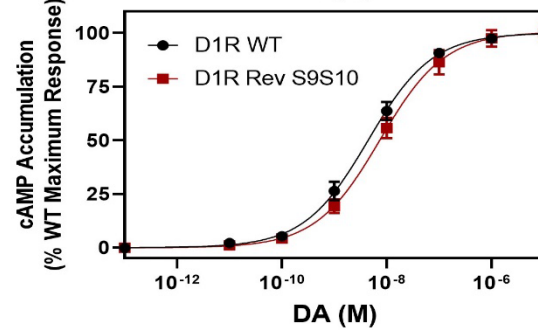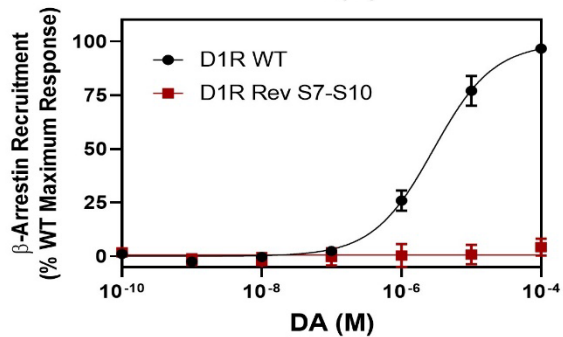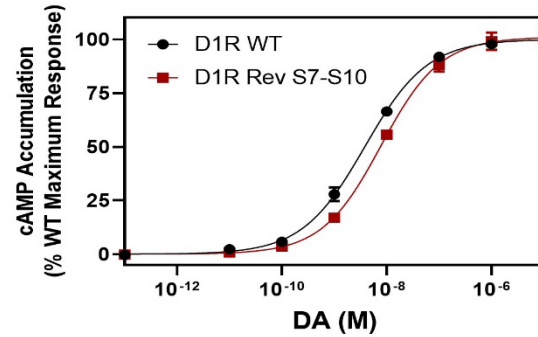

**Figure S3.** The indicated D1R reverse mutants in the proximal C-terminus are unable to recruit  $\beta$ -arrestin with DA stimulation while G-protein signaling is unaffected. CAAX  $\beta$ -arrestin recruitment (left panels) and CAMYEL cAMP accumulation assays (right panels) were performed as described in *Methods*. **Left panels** (from top): D1R WT  $EC_{50} = 3.6 \mu M \pm 1.1 \mu M$ ,  $E_{max} = 100\%$ ; D1R Rev S1T2  $EC_{50} > 100 \mu M$ ,  $E_{max} = \text{not defined}$ . D1R WT  $EC_{50} = 3.6 \pm 1.1 \mu M$ ,  $E_{max} = 100\%$ ; D1R Rev T3T4  $EC_{50} > 100 \mu M$ ,  $E_{max} = \text{not defined}$ . D1R WT  $EC_{50} = 2.5 \pm 0.4 \mu M$ ,  $E_{max} = 100\%$ ; D1R Rev S7S8  $EC_{50} > 100 \mu M$ ,  $E_{max} = \text{not defined}$ . D1R WT  $EC_{50} = 2.9 \pm 0.3 \mu M$ ,  $E_{max} = 100\%$ ; D1R Rev S9S10  $EC_{50} > 100 \mu M$ ,  $E_{max} = \text{not defined}$ . D1R WT  $EC_{50} = 3.3 \pm 1.0 \mu M$ ,  $E_{max} = 100\%$ ; D1R Rev S7-S10  $EC_{50} > 100 \mu M$ ,  $E_{max} = \text{not defined}$ . **Right panels** (from top): D1R WT  $EC_{50} = 8.8 \pm 5.1 \text{ nM}$ ,  $E_{max} = 100\%$ ; D1R Rev S1T2  $EC_{50} = 26 \pm 17 \text{ nM}$ ,  $E_{max} = 101 \pm 3.2\%$ . D1R WT  $EC_{50} = 8.8 \pm 5.1 \text{ nM}$ ,  $E_{max} = 100\%$ ; D1R Rev T3T4  $EC_{50} = 26 \pm 19 \text{ nM}$ ,  $E_{max} = 101 \pm 3.0\%$ . D1R WT  $EC_{50} = 4.8 \pm 1.4 \text{ nM}$ ,  $E_{max} = 100\%$ ; D1R Rev S7S8  $EC_{50} = 9.9 \pm 3.4 \text{ nM}$ ,  $E_{max} = 102 \pm 5.0\%$ . D1R WT  $EC_{50} = 4.8 \pm 1.4 \text{ nM}$ ,  $E_{max} = 100\%$ ; D1R Rev S9S10  $EC_{50} = 7.8 \pm 1.7 \text{ nM}$ ,  $E_{max} = 100 \pm 4.2\%$ . D1R WT  $EC_{50} = 3.9 \pm 0.5 \text{ nM}$ ,  $E_{max} = 100\%$ ; D1R Rev S7-S10  $EC_{50} = 8.0 \pm 1.3 \text{ nM}^*$ ,  $E_{max} = 101 \pm 4.8\%$ . Data are expressed as a percentage of the maximum D1R WT response to DA and are shown as mean  $\pm$  SEM of at least three experiments each performed in triplicate. Statistical comparisons between D1R WT and mutant parameters in the CAMYEL cAMP accumulation assays made using a t-test:  $*p < 0.05$ .

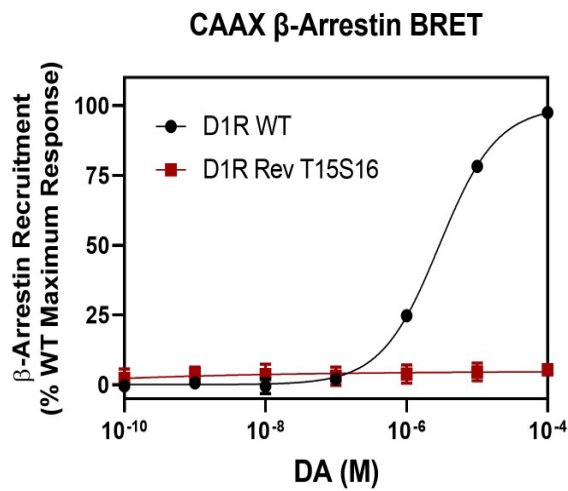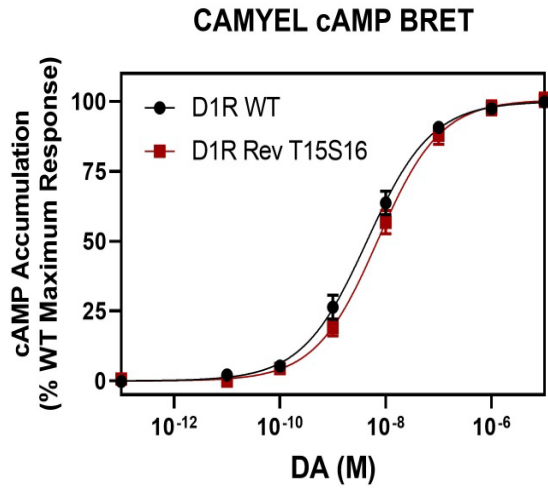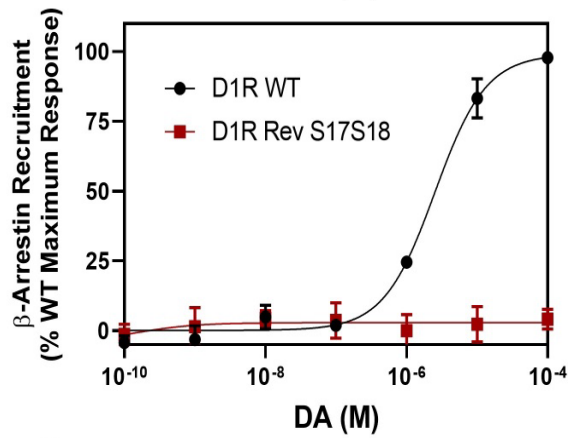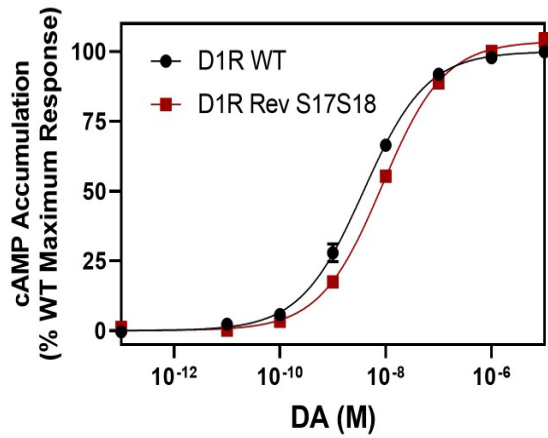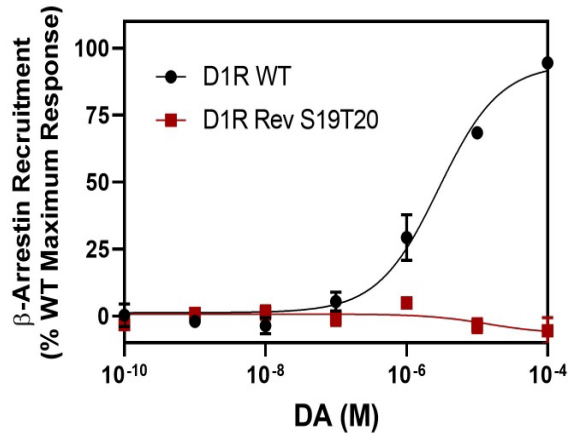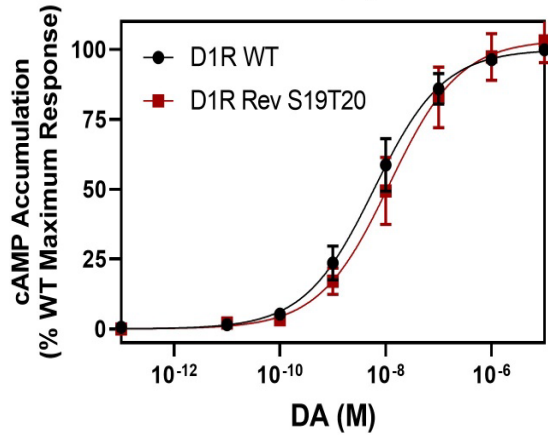

**Figure S4.** The indicated D1R reverse mutants in the distal C-terminus are unable to recruit  $\beta$ -arrestin upon DA stimulation while G-protein signaling is unaffected. CAAX  $\beta$ -arrestin recruitment (left panels) and CAMYEL cAMP accumulation assays (right panels) were performed as described in *Methods*. **Left panels** (from top): D1R WT  $EC_{50} = 2.9 \pm 0.2 \mu M$ ,  $E_{max} = 100\%$ ; D1R Rev T15S16  $EC_{50} > 100 \mu M$ ,  $E_{max} = \text{not defined}$ . D1R WT  $EC_{50} = 2.6 \pm 0.3 \mu M$ ,  $E_{max} = 100\%$ ; D1R Rev S17S18  $EC_{50} > 100 \mu M$ ,  $E_{max} = \text{not defined}$ . D1R WT  $EC_{50} = 3.6 \pm 1.1 \mu M$ ,  $E_{max} = 100\%$ ; D1R Rev S19T20  $EC_{50} > 100 \mu M$ ,  $E_{max} = \text{not defined}$ . **Right panels** (from top): D1R WT  $EC_{50} = 4.8 \pm 1.4 \text{ nM}$ ,  $E_{max} = 100\%$ ; D1R Rev T15S16  $EC_{50} = 7.5 \pm 1.8 \text{ nM}$ ,  $E_{max} = 101 \pm 2.5\%$ . D1R WT  $EC_{50} = 3.9 \pm 0.5 \text{ nM}$ ,  $E_{max} = 100\%$ ; D1R Rev S17S18  $EC_{50} = 8.7 \pm 1.2 \text{ nM}^*$ ,  $E_{max} = 104 \pm 2.0\%$ . D1R WT  $EC_{50} = 8.8 \pm 5.1 \text{ nM}$ ,  $E_{max} = 100\%$ ; D1R Rev S19T20  $EC_{50} = 18 \pm 11 \text{ nM}$ ,  $E_{max} = 103 \pm 7.3\%$ . Data are expressed as a percentage of the maximum D1R WT response to DA and are shown as means  $\pm$  standard error of the mean (SEM) of at least three experiments performed in triplicate. Statistical comparisons between D1R WT and mutant parameters in the CAMYEL cAMP accumulation assays were made using a t-test:  $*p < 0.05$ .
